# Supplementary material
Source: Elsevier journal article supplement (https://www.sciencedirect.com/science/article/pii/S0870255122004796)
Supplement: mmc1 [file S0870255122004796:mmc1.doc]

PRISMA Flow Diagram

Full-text articles excluded, with reasons
(n = 24)

systematic reviews and meta-analysis (n 9); case reports and case series (n7); 5 review articles (n 5); 2 single arm studies (2); 1 trial design (1)

Studies included in qualitative synthesis
(n = 14 )

Full-text articles assessed for eligibility
(n =38)

Records excluded
(n = 279)

Records screened
(n = 317)

Records after duplicates removed
(n =317)

Additional records identified through other sources
(n = 6 )

## Identification

## Eligibility

## Included

## Screening

Records identified through database searching
(n = 363 )

Studies included in quantitative synthesis (meta-analysis)
(n = 14) (9 full-text and 5 structured abstracts)
